# Supplementary material
Source: PubMed Central journal article supplement (PMC6546431)

**Supplementary Figure 1:** Representative sections of sham treated **(a)** and BH treated **(b)** RCC stained for NADH diaphorase. NADH-d staining is preserved in the tissue slurry contained within the BH treatment volume indicating the absence of thermal damage to the proteins within the slurry. T – RCC tumor, C – benign kidney cortex, BH – liquefied region, N – area of necrosis in the tumor.

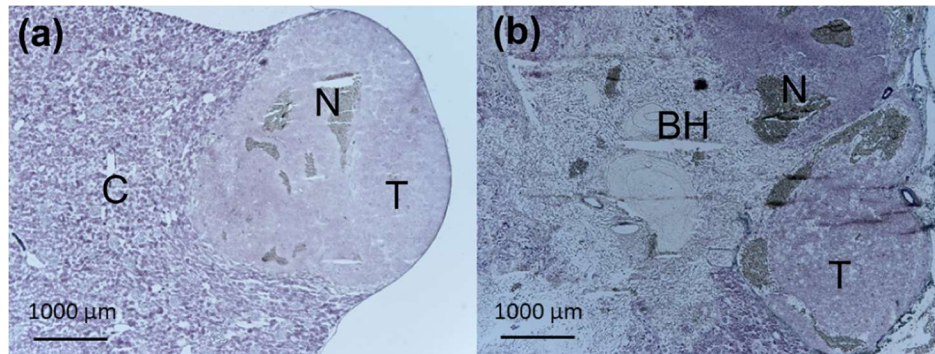

**Supplementary Figure 2:** The dynamics of circulating plasma cytokines over the course of 48 hours post BH (purple bars) and sham (grey bars) treatment (n=4/group). The levels of these analytes did not exhibit any trends, and no statistically significant differences from control group were observed. Error bars represent standard error. All levels are normalized to the pre-treatment level (“Pre”).

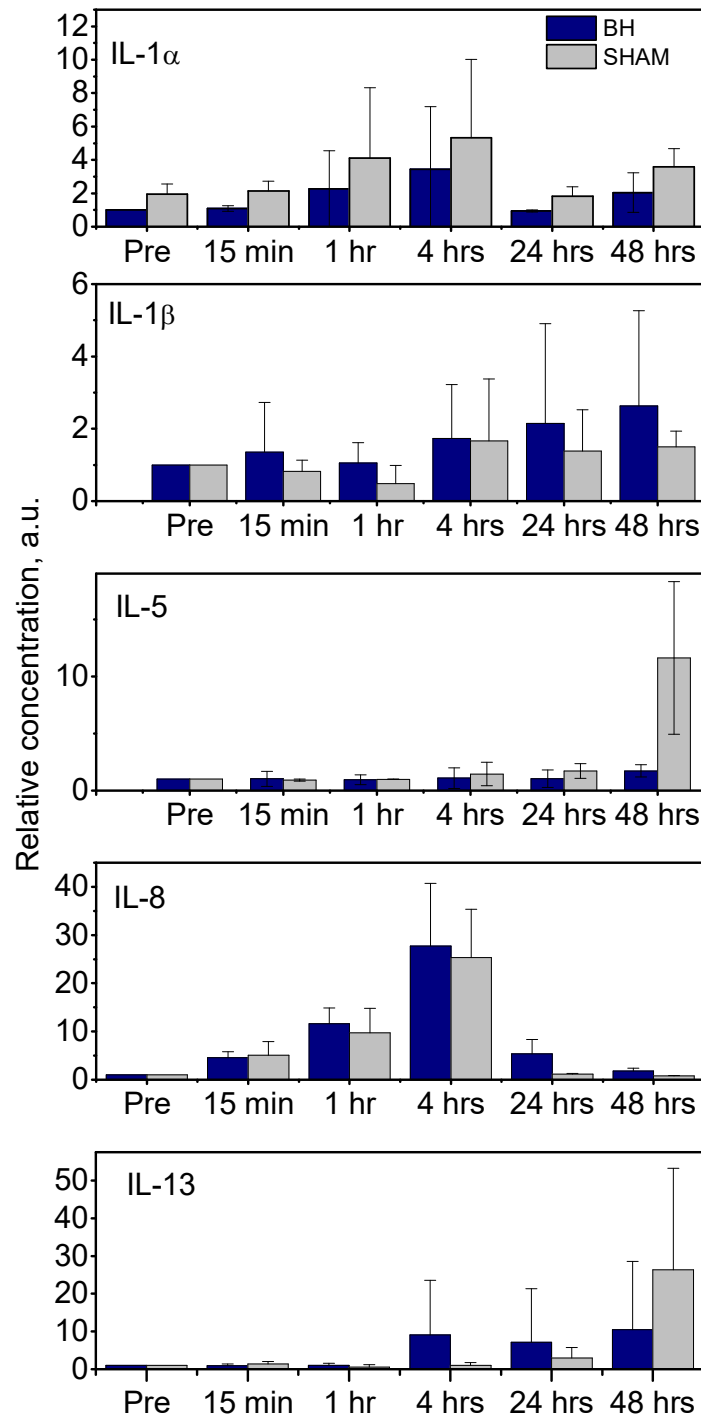

**Supplementary Figure 3:** Representative IHC sections of BH-treated (left) and sham-treated (right) kidneys stained for **(a)** M1 macrophages (CD163), **(b)** M2 macrophages (F4/80), **(c)** dendritic cells (CD11c+), **(d)** CD4+ T cells, **(e)** regulatory T cells (FoxP3+) and **(f)** neutrophils (MPO). Scale bar is 500  $\mu$ m. BH - liquefied area, T – tumor, C – benign kidney cortex.

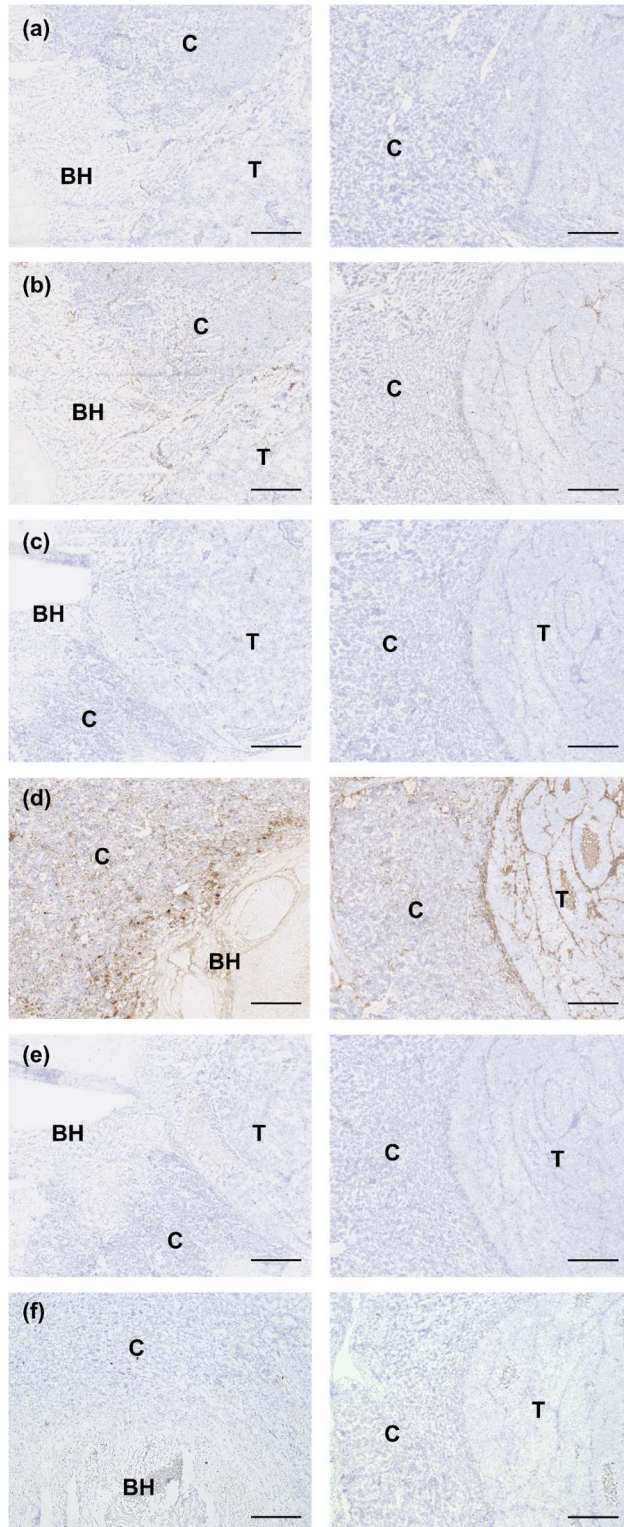

Supplement: NIHMS1507267-supplement-1.pdf [file NIHMS1507267-supplement-1.pdf]
